# Supplementary material
Source: Springer Nature journal article supplement (https://www.springermedizin.de/resource/supplementary/12876_2012_1046_MOESM5_ESM.pdf/9438418)
Supplement: MOESM5 [file 9438418]

**A. Diagnostic criteria for UGIC**

Cadarette's Criteria

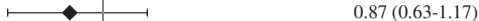

EU-ADR Criteria

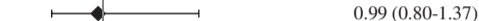**B. Length of current exposure**

7 days

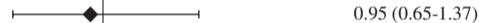

15 days

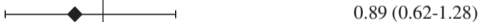

45 days

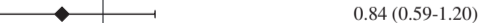

0.4 0.6 0.8 1 1.2 1.4 1.6 1.8
